# Supplementary material
Source: Springer Nature journal article supplement (https://www.springermedizin.de/resource/supplementary/12888_2013_1629_MOESM1_ESM.pdf/9481004)

**Violin Plots of Posterior Distributions for Bias – Melancholic**

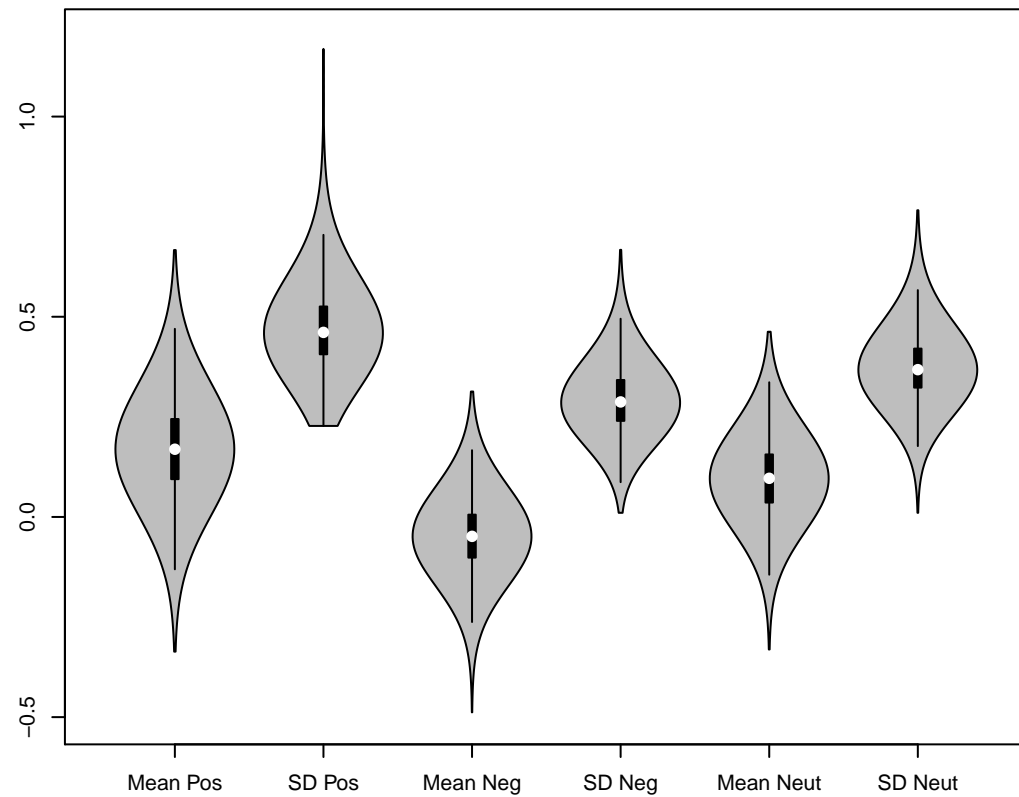

**Violin Plots of Posterior Distributions for Bias – Non-Melancholic**

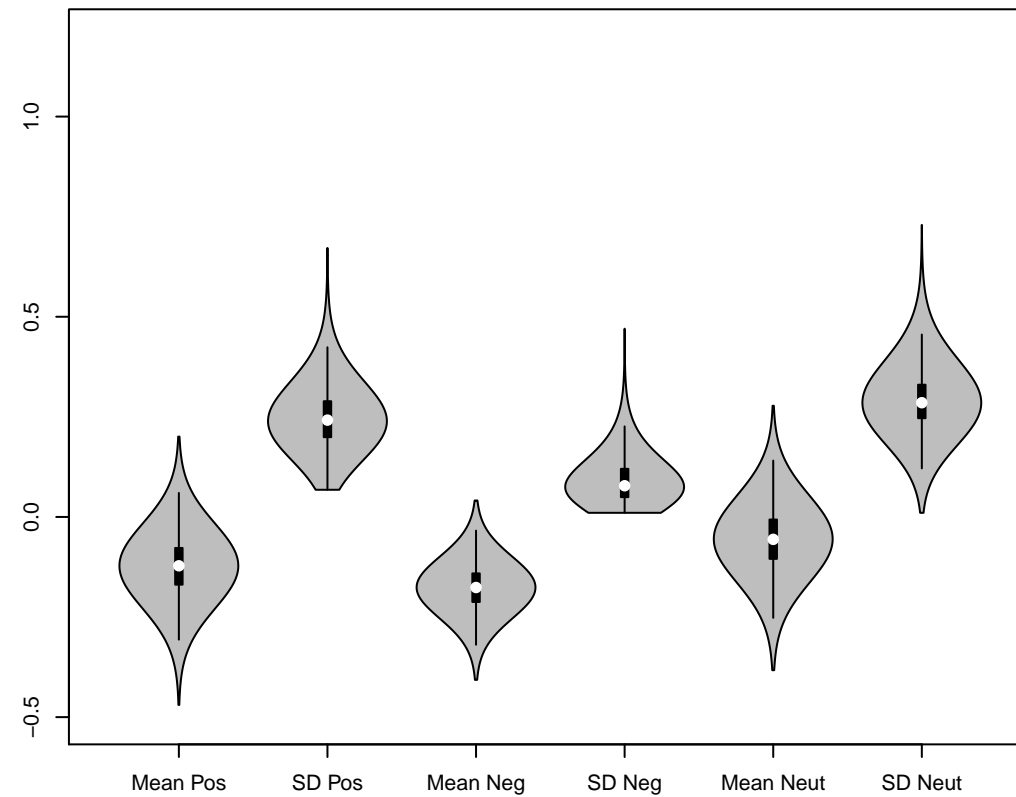

**Violin Plots of Posterior Distributions for Bias – Control**

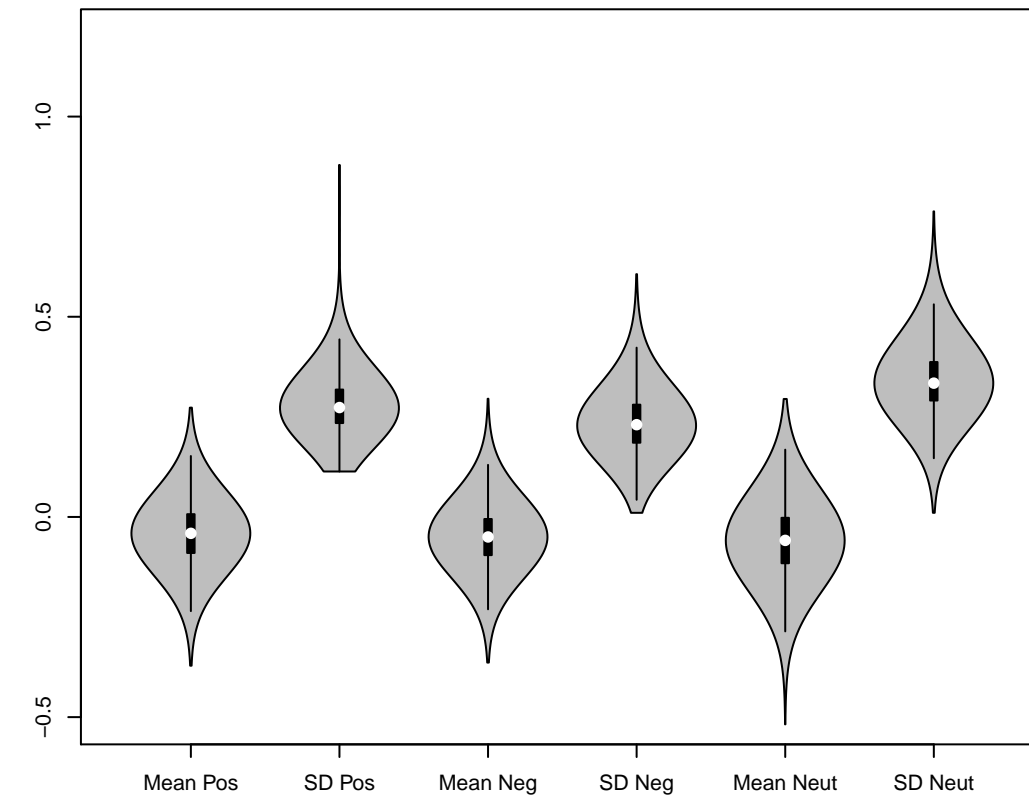

**Violin Plots of Posterior Distributions for Discriminability – Melancholic**

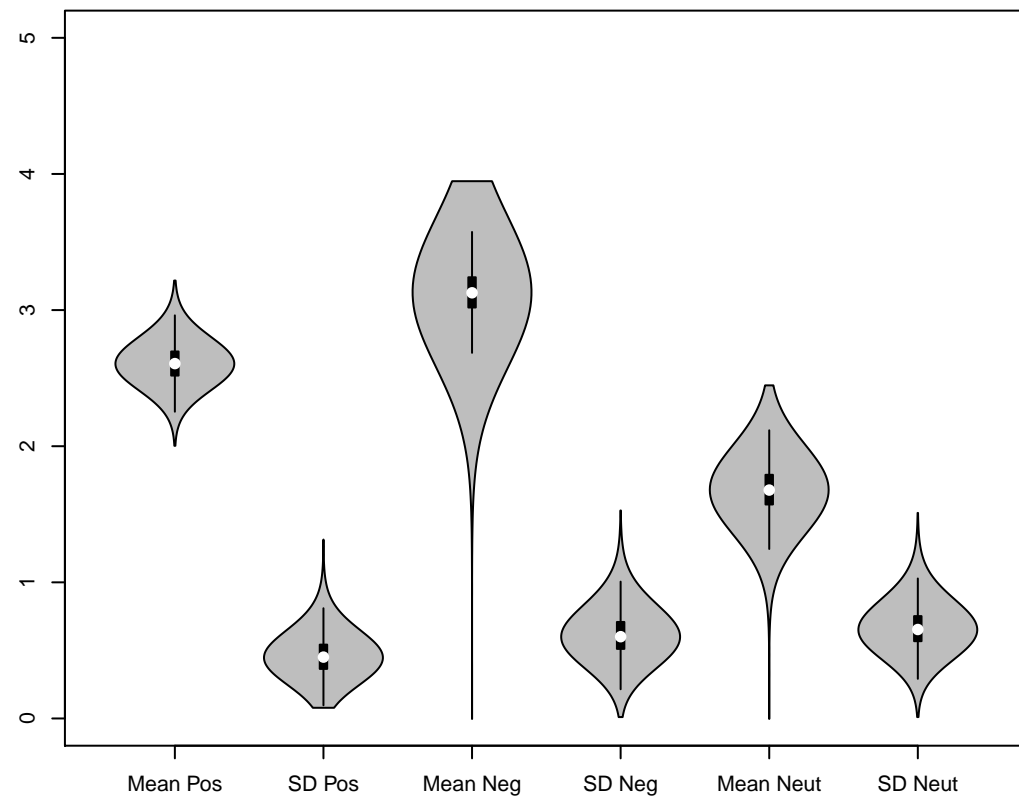

**Violin Plots of Posterior Distributions for Discriminability – Non-Melancholic**

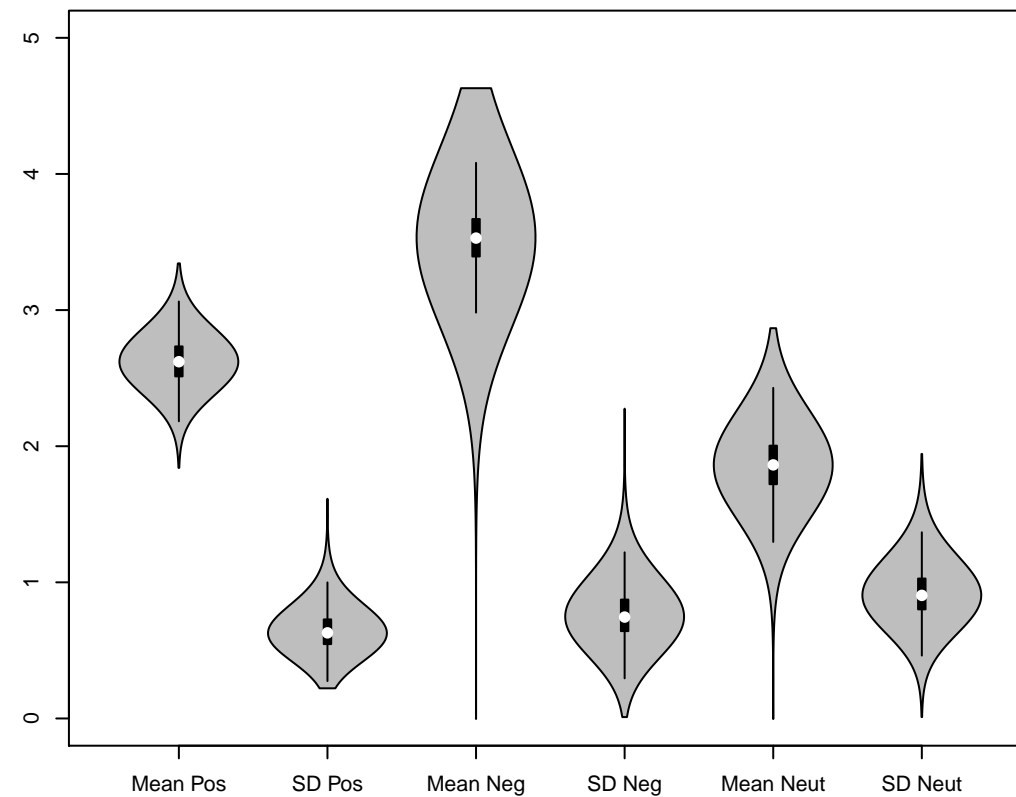

**Violin Plots of Posterior Distributions for Discriminability – Control**

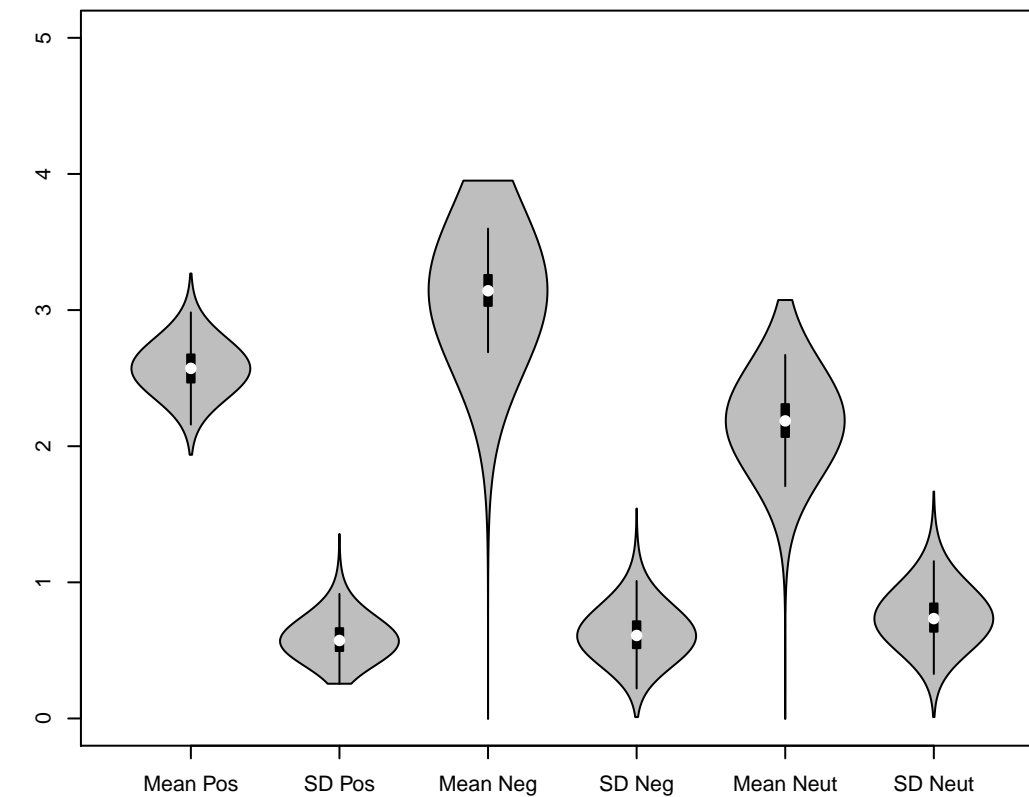

Supplement: MOESM1 [file 9481004]
